# Supplementary material for: Boosting the photodegradation of rhodamine B with the CuWO4/g-C3N4 heterojunction by introducing biomass derived N-CQDs as an electron mediator: mechanism and DFT calculations
Source: Royal Society of Chemistry journal article supplement (doi:10.1039/d3nj05016e), 2023-01-01
Supplement: d3nj05016e1.pdf [file d3nj05016e1.pdf]

**Boosting photodegradation of Rhodamine B with CuWO<sub>4</sub>/g-C<sub>3</sub>N<sub>4</sub>  
heterojunction by introducing biomass derived N-CQD as electron  
mediator: Mechanism and DFT Calculation**

**Synthesis of N-CQD/CN**

N-CQD/CN have been synthesized through a solvothermal technique. 100 mg of CN was dispersed in methanol/H<sub>2</sub>O medium to obtain a dispersed solution. To the above solution certain amount of N-CQD was added to obtain ratio and stirred for 20 min. The mixture was heated at 140 °C for 6h in a 100 ml Teflon-lined autoclave. The obtained product was filtered and oven dried at 60 °C to obtain N-CQD/CN with mass ratios 0.2, 0.3 and 0.4.

**Synthesis of CWO/CN**

100 mg of CN was dispersed in methanol/H<sub>2</sub>O medium to obtain a dispersed solution. To the above solution certain amount of CWO was added and sonicated for approximately 5 hours. After sonication, the resultant mixture was then stirred for approximately 24 hours. The obtained product was filtered and rinsed multiple times with distilled water/ethanol medium. Lastly, the product was vacuum-dried at 60 °C to obtain 0.2-CWO/CN.

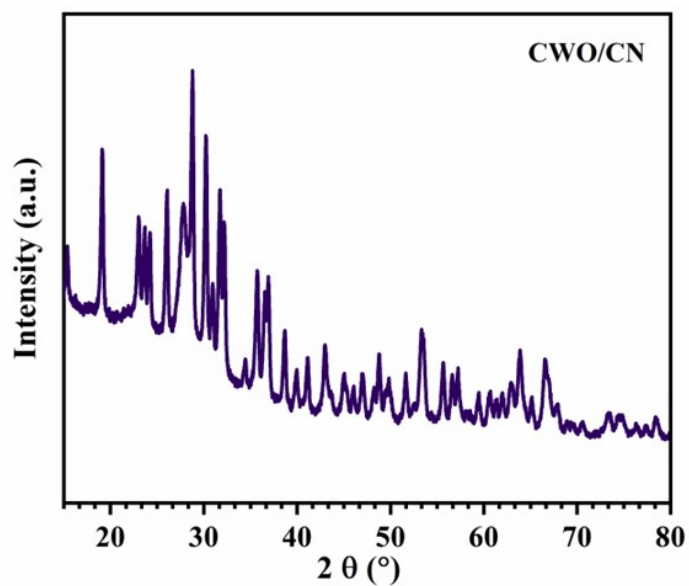

Fig. S1: XRD pattern of CWO/CN.

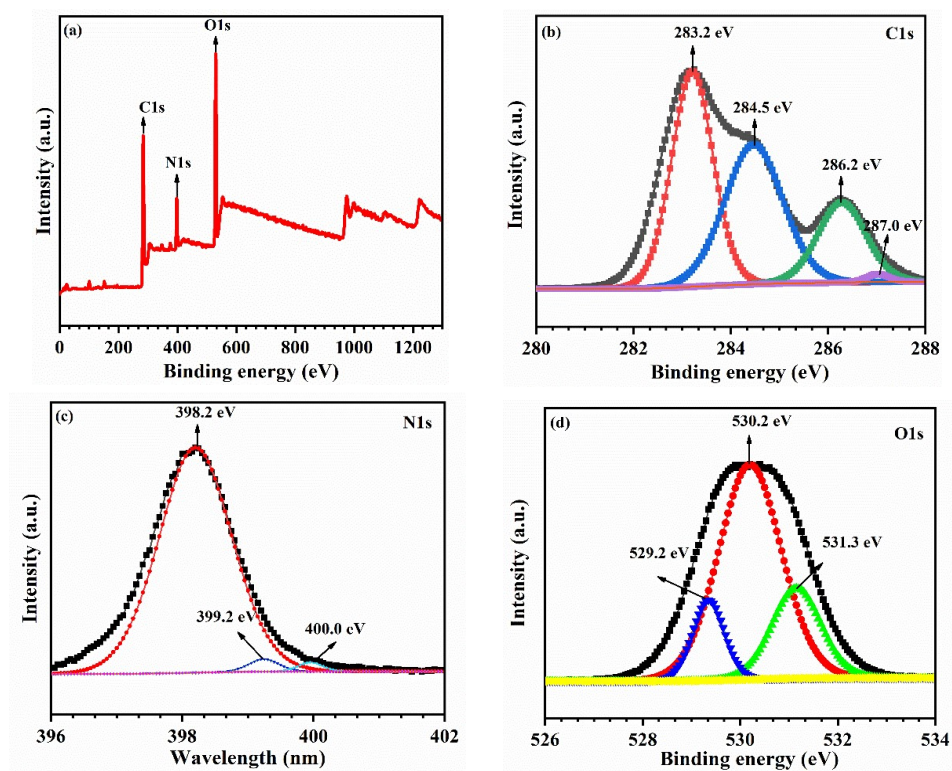

Fig. S2: XPS analysis of N-CQD

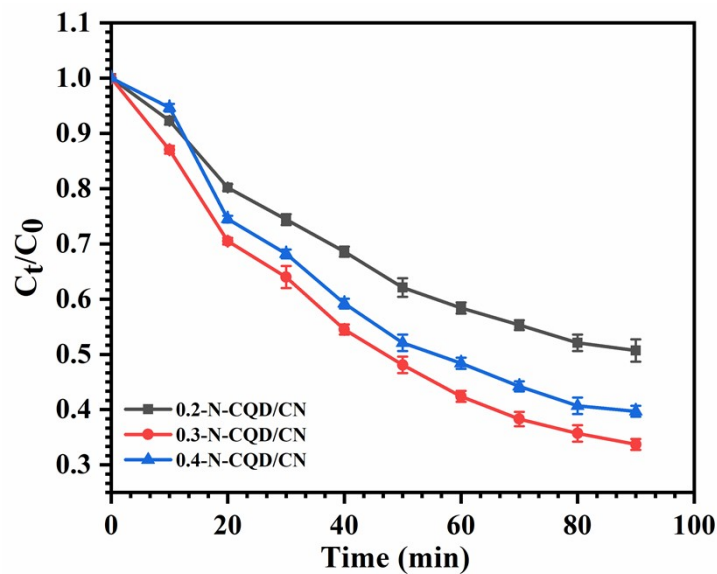

**Fig. S3:** Photocatalytic degradation efficiency of N-CQD/CN composites.

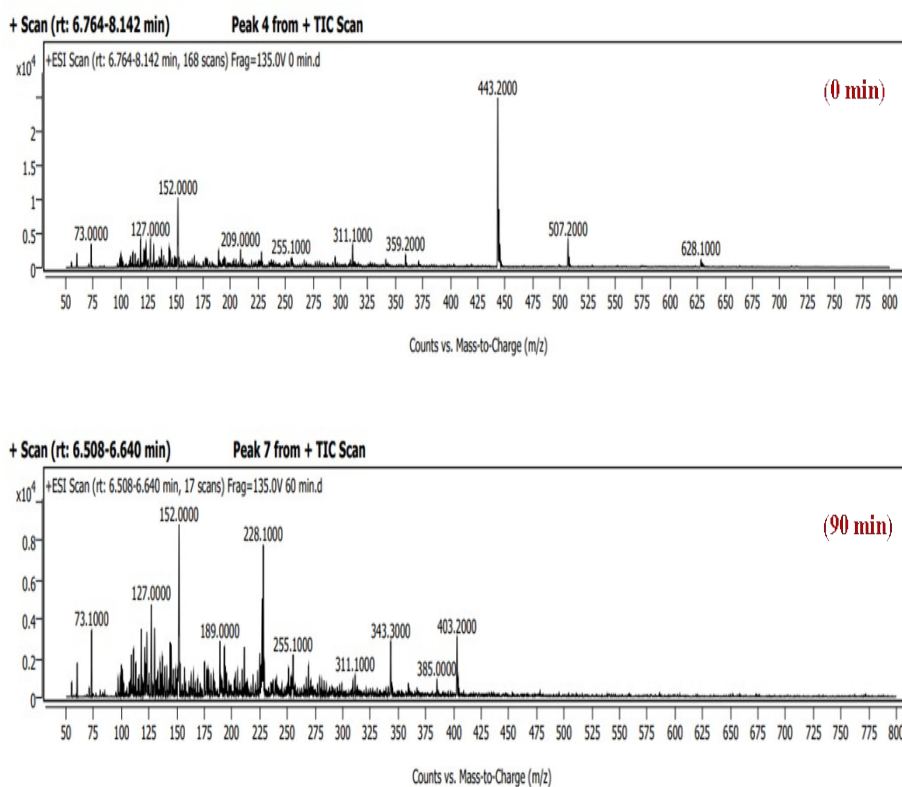

**Fig. S4:** LCMS spectra of Rh B dye solution at 0 mins, and 90 mins during degradation reaction catalysed by CWO/N-CQD/CN.
